1 **Pharmacological enrichment of polygenic risk for precision medicine in complex**  
2 **disorders**

3 William R. Reay<sup>1,2</sup>, Joshua R. Atkins<sup>1,2</sup>, Vaughan J. Carr<sup>3,4,5</sup>, Melissa J. Green<sup>3,4</sup>, Murray J.

4 Cairns<sup>1,2</sup> \*

5 <sup>1</sup>School of Biomedical Sciences and Pharmacy, The University of Newcastle, Callaghan,  
6 NSW, Australia

7 <sup>2</sup>Centre for Brain and Mental Health Research, Hunter Medical Research Institute,  
8 Newcastle, NSW, Australia

9 <sup>3</sup>School of Psychiatry, University of New South Wales, Randwick, NSW, Australia

10 <sup>4</sup>Neuroscience Research Australia, Sydney, NSW, Australia

11 <sup>5</sup>Department of Psychiatry, Monash University, Melbourne, VIC, Australia

12

13 To whom correspondence should be addressed:

14 Professor Murray J. Cairns

15 School of Biomedical Science and Pharmacy, The University of Newcastle, University Drive,

16 Callaghan, NSW 2308, Australia, Email: [Murray.cairns@newcastle.edu.au](mailto:Murray.cairns@newcastle.edu.au), Phone: +61 02

17 4921 8670, Fax: +61 02 4921 7903

18

19

20

21

22

23

24

25

26 **ABSTRACT**

27 Individuals with complex disorders typically have a heritable burden of common variation  
28 that can be expressed as a polygenic risk score (PRS). While PRS has some predictive utility,  
29 it lacks the molecular specificity to be directly informative for clinical interventions. We  
30 therefore sought to develop a framework to quantify an individual's common variant  
31 enrichment in clinically actionable systems responsive to existing drugs. This was achieved  
32 with a metric designated the *pharmagenic enrichment score* (PES), which we demonstrate for  
33 individual SNP profiles in a cohort of cases with schizophrenia. A large proportion of these  
34 had elevated PES in one or more of eight clinically actionable gene-sets enriched with  
35 schizophrenia associated common variation. Notable candidates targeting these pathways  
36 included vitamins, insulin modulating agents, and protein kinase inhibitors with putative  
37 neuroprotective properties. Interestingly, elevated PES was also observed in individuals with  
38 otherwise low common variant burden. The biological saliency of PES profiles were  
39 observed directly through their impact on gene expression in a subset of the cohort with  
40 matched transcriptomic data, supporting our assertion that this framework can integrate an  
41 individual's common variant risk to inform personalised interventions, including drug  
42 repositioning, for complex disorders such as schizophrenia.

43

44

45

46

47

48

49

50

## 51 INTRODUCTION

52 A significant burden of disease is caused by complex traits including psychiatric and  
53 neurobehavioural disorders, inflammatory and autoimmune disorders, metabolic and  
54 cardiovascular disease, and cancer. Until relatively recently it was difficult to identify the  
55 heritable components of these traits, however, the emergence of well powered genome-wide  
56 association studies (GWAS) using large cohorts assembled by collaborative consortia are  
57 revealing important insights into their common variant architecture <sup>1</sup>. While collectively this  
58 information has been vital to map genes and pathways that are likely to be etiological factors,  
59 the small effect size of each variant, and their heterogeneity in the population make their  
60 relevance to individuals with the disorder highly variable, relatively specific, and fairly minor  
61 with respect to the total variant burden. They also present as relatively small targets for  
62 therapeutic intervention and may not attract the investment needed for pharmaceutical  
63 development. We therefore need mechanisms for using this vast amount of diverse genetic  
64 information to maximise its utility for therapeutic advances. This requires a personalised  
65 approach that can capture variant burden in affected individuals with respect to biological  
66 components that align with existing medications, and/or pathways of relevance to key  
67 pathophysiological processes, to provide sufficient support for the development of new  
68 interventions.

69  
70 While approaches that summate the genomic risk burden in individuals, such as polygenic  
71 risk scoring (PRS), have demonstrated some predictive utility for complex traits (such as  
72 neuropsychiatric disorders <sup>2,3</sup>, diabetes <sup>4,5</sup>, cardiovascular disease <sup>6,7</sup>, and inflammatory  
73 disorders <sup>8,9</sup>) their composition of heterogeneous risk factors lack the biological salience  
74 needed to design a precision treatment strategy. We, however, hypothesized that the  
75 biologically supervised enrichment of trait-associated common variants in clinically

76 actionable pathways would provide a means of pharmacologically annotating PRS in  
77 individuals. To test this proposal, we devised a statistical framework for scoring polygenic  
78 risk (at the multivariable level) in pathways relevant as therapeutic targets for complex traits.  
79 This quantitative approach, designated the *pharmagenic enrichment score* (PES), was  
80 developed to provide an indication of an individual's exposure to risk variants that are  
81 potentially treatable by existing pharmacological agents, including many that have never  
82 been considered or tested previously for the condition/disorder they are experiencing. By  
83 focusing on biological pathways with known drug targets, we endeavour to enhance the  
84 clinical utility of polygenic risk approaches by providing novel and specific opportunities to  
85 identify treatment targets and/or repurpose existing drugs. This application of genome-wide  
86 common variant genotyping should have particular relevance for the precision treatment of  
87 individuals that are resistant to currently indicated medications. In this study we outlined the  
88 PES approach and sought to exemplify its utility in individuals with the complex psychiatric  
89 condition, schizophrenia.

90

91

## 92 **MATERIALS AND METHODS**

### 93 **Pipeline for the derivation of *pharmagenic enrichment scores***

94 The methodology developed for constructing *pharmagenic enrichment scores* (PES) is  
95 outlined in a schematic presented in Supplementary Figure 1. We exploit the results of gene-  
96 set association analysis to aggregate variants from GWAS into gene-sets which may be  
97 candidates for pharmacological intervention. These gene-sets were high quality canonical and  
98 hallmark pathways sourced from the molecular signatures database (MSigDB)<sup>10</sup>. Pathways  
99 were designated as clinically relevant if they contained at least one gene annotated to interact

100 with an approved pharmacological agent in the DrugCentral database as classified by the  
101 Target Central Resource Database (TCRD, genes annotated as  $T_{\text{Clin}}$ )<sup>11</sup>.

102

103 Firstly, this process tests the combined effect of variants at the gene level. We utilised an  
104 omnibus  $P$  value test to achieve this, whereby a linear combination of variant-wise  $P$  values  
105 in a gene is compared to a null distribution to derive a combined  $P$  value for that gene. This  
106 was performed using the MAGMA package to account for linkage disequilibrium between  
107 variants in the approximation of the null  $\chi^2$  distribution<sup>12</sup>. We mapped SNPs to protein  
108 coding genes (hg19, NCBI) with the genic boundaries encompassing 5kb upstream and 1.5  
109 kb downstream to capture variation in regulatory regions. Genes within the major  
110 histocompatibility complex (MHC) on chromosome 6 were excluded from this study due to  
111 the complexity of haplotypes in that region. Traditionally, the full breadth of variants  
112 available in the summary statistics are utilised in these models. This, however, may miss  
113 important aspects of the biological interpretation of the genomic signal. PRS derived from  
114 large GWAS cohorts are tested at different  $P$  value thresholds ( $P_T$ ) to exploit a model which  
115 explains the most variance between the case and control groups (in a dichotomous construct).  
116 For instance, a  $P_T < 0.05$  means that only  $P$  values in the GWAS with a stronger association  
117 ( $P$  value) than this threshold are included. A range of  $P_T$  have been suggested to be optimal  
118 for PRS in several disorders depending on their genomic architecture<sup>2; 7; 13</sup>. Aggregating the  
119 combined effects of variants in genes at different  $P_T$  may therefore capture the biological  
120 complexity of the signal at varying degrees of polygenicity.

121

122 Once variants are aggregated in genes at varying significance thresholds ( $P_T$ ), we conduct  
123 gene-set association of the pre-defined druggable gene-sets with the trait of interest. This was  
124 a competitive association test, which tests the null hypothesis of genes in the set being no

125 more strongly associated than all other genes. This model was implemented with the  
126 MAGMA package. Enriched pathways with a known drug target uncovered from this  
127 pipeline then form the basis of calculating the *pharmagenic enrichment score* (PES). To  
128 profile individuals for a PES, genes which compromise the candidate pathway are extracted  
129 and cumulative genomic risk calculated in an analogous fashion to PRS, assuming an  
130 additive model <sup>2</sup>. Each individual profiled thus has a genomic risk score within each  
131 clinically actionable pathway.

132

### 133 **Application of *pharmagenic enrichment score* to identify drug repurposing candidates** 134 **for schizophrenia**

135 To identify clinically actionable gene-sets and construct PES, we processed the 2014  
136 psychiatric genomics consortium GWAS for the complex neuropsychiatric disorder  
137 schizophrenia with the pipeline described above <sup>3</sup>. Variants were selected based on their  
138 significance (*P* value) for inclusion in the at four different thresholds – all SNPs,  $P < 0.5$ ,  $P <$   
139  $0.05$ , and  $P < 0.005$ . Geneset association was conducted on 1012 MSigDB pathways with at  
140 least one druggable ( $T_{Clim}$ ) gene. To capture a wide variety of pathways for a complex  
141 phenotype like schizophrenia, we used a nominal significance threshold of  $P < 0.001$  to select  
142 candidate pathways for PES.

143

144 We annotated each of these candidate pathways for their drug interactions, tissue specificity,  
145 and phenotypic associations. Using WebGestalt, drugs which target a statistically significant  
146 number of genes in the PES gene-sets were identified after the application of multiple testing  
147 correction ( $FDR < 0.05$ ) <sup>14</sup>. A minimum overlap of at least three targets overlapping the  
148 geneset for each pharmaceutical agent was also implemented. Drugs were also mapped to  
149 gene-sets using DGidb v3.02, with the top FDA approved drug per pathway was selected

150 based on the DGidb score of interaction confidence between a  $T_{\text{Clin}}$  gene and drug <sup>15</sup>. Further,  
151 the tissue specificity of expression for all genes from the eight pathways was investigated  
152 using GENE2FUNC application of FUMA <sup>16</sup>. Transcript expression in each of the 53 tissue  
153 types in the GTEx v7 dataset for the input pathway genes was tested for upregulation,  
154 downregulation and two-sided differential expression in comparison to the entire protein-  
155 coding genome. Enrichment of input genes for associated traits in GWAS catalogues was  
156 also tested in the FUMA framework.

157

### 158 **Individual profiling of *pharmagenic enrichment scores* in a genotyped schizophrenia** 159 **cohort**

160 We sought to generate PES for the schizophrenia candidate pathways in a cohort of  
161 diagnosed schizophrenia cases and non-neuropsychiatric controls sourced from the Australian  
162 Schizophrenia Research Bank (ASRB) <sup>17; 18</sup>. Detailed descriptions of consent procedures  
163 along with inclusion and exclusion criteria for the ASRB have been extensively described  
164 elsewhere <sup>17</sup>. The Illumina Infinium Human 610K (610-Quad) BeadChip platform was used  
165 to genotype genomic DNA extracted from peripheral blood mononucleocytes as per standard  
166 manufacturer protocols. Variant and individual level quality control, along with imputation  
167 using the 1000 genomes phase 3 European reference panel, has been outlined in detail for this  
168 cohort previously <sup>18</sup>. High quality autosomal sites with low missiness ( $< 2\%$ ) and an  
169 imputation score greater than 0.8 ( $R^2 > 0.8$ ) were retained for analysis in this study. After the  
170 removal of individuals in the post-genotyping quality control, 425 schizophrenia cases and  
171 251 controls were analysed in this study; cases were 67% male, whilst males comprised 44%  
172 of the control cohort (Supplementary Table 5). The use of these data was approved by the  
173 University of Newcastle Human Ethics Research Committee (HREC).

174 PES is calculated from SNPs mapped to genes which form the candidate pharmacologically  
175 actionable geneset. This comprises the following model (1) which sums the statistical effect  
176 size of each variant in the geneset multiplied the allele count (dosage) for said variant– for  
177 individual  $i$ , let  $\hat{\beta}_j$  denote the statistical effect size from the GWAS for each variant  $j$  in the  
178 candidate gene-set, multiplied by the dosage ( $G$ ) of  $j$  in  $i$ .

$$179 \quad PES_i = \sum_j^M (\hat{\beta}_j \times G_{ij}) \quad (1)$$

180 This was calculated for the individuals using the PRSice2 package<sup>19</sup>. For each PES, the  $P_T$   
181 used to derive the score was selected based on which  $P_T$  the corresponding geneset was  
182 derived from the GWAS, when a geneset was associated at multiple  $P_T$ , the most significant  
183 was chosen. A genome-wide PRS (PRS<sub>Total</sub>) was also constructed for this cohort, with the  $P_T$   
184 which explained the most variance between cases and controls selected using Nagelkerke's  
185  $R^2$ . Association for each of the scores with cases was conducted using binomial logistic  
186 regression, adjusted for sex and the first three principal components using R 3.4.4.  $P$  values  
187 were derived using the Wald test with and without the total PRS score at the optimum  
188 threshold as a covariate in the model.

189  
190 Each PES was ranked for individuals within the ASRB cohort, with three metrics used to  
191 define a person with an 'elevated PES' score: the top percentile, decile, and quartile of the  
192 study population. The number of pathways which pass these thresholds were totalled for each  
193 individual and the association between these totals and schizophrenia assessed using the same  
194 model as for univariate PRS as described above. To investigate the relationship between  
195 PRS<sub>Total</sub> and PES, genome wide PRS<sub>Total</sub> and the count of PES in the top decile per individual  
196 were clustered using finite Gaussian mixture modelling (GMM) with the mclust package  
197 version 5.4<sup>20</sup>. The optimal number of clusters was selected based on parametrisation of the



198 covariance matrix utilising the Bayesian Information Criterion (BIC), with the highest BIC  
199 value used for selection of the number of clusters. Clusters were ellipsoidal, with the volume  
200 of the ellipsoid, shape of the density contours, and orientation of the corresponding ellipsoid  
201 also determined by the covariance matrix. We tested whether schizophrenia cases in each of  
202 the four GMM derived clusters were overrepresented for carriers of a top percentile PES  
203 using multinomial logistic regression with the *nnet* package ([https://cran.r-](https://cran.r-project.org/web/packages/nnet/index.html)  
204 [project.org/web/packages/nnet/index.html](https://cran.r-project.org/web/packages/nnet/index.html)). The largest cluster, *Cluster 2*, was used as the  
205 reference for the other clusters, with the model covaried for sex and principal components as  
206 above. After dividing the regression coefficients by their standard error to derive  $z$ ,  $P$  values  
207 were calculated using the Wald Test.

208

### 209 **Investigation of the effect of PES profiles on gene expression**

210 We sought to investigate the relationship between PES profiles and the expression of genes  
211 which comprise their pathways in individuals with schizophrenia. A subset of schizophrenia  
212 cases in this cohort ( $N = 75$ ) had mRNA expression data available from a previous study<sup>21</sup>.  
213 These participants had a mean age of 42.21 (s.d. = 10.47), whilst the majority of the  
214 subcohort was male ( $N_{\text{Male}} = 45$ ,  $N_{\text{Female}} = 30$ ). RNA extracted from peripheral blood  
215 mononuclear cells was profiled using Illumina HT-12\_V3 BeadChips and normalised as  
216 described in Gardiner *et al.*<sup>21</sup>. Genes which comprise each PES pathway were extracted if  
217 they were available on the array with normalised expression values which survived quality  
218 control. The relationship between PES and the expression of each gene in that pathway as the  
219 outcome was assessed using a linear model covaried for age, sex, and  $\text{PRS}_{\text{Total}}$  for  
220 schizophrenia. These models were constructed in R version 3.4.4 using the *lm* function.  
221 Multiple testing correction was applied to each PES model individually to account for the

222 number of genes tested in each pathway using Benjamini-Hochberg method via the *p.adjust*  
223 function in R.

224

## 225 **RESULTS**

### 226 **Clinically actionable pathways enriched with common variant risk in schizophrenia**

227 Schizophrenia is a typical complex trait disorder with a prevalence around 0.7% and  
228 heritability in the region of 80%<sup>22; 23</sup>. A substantial proportion of this heritability was  
229 accounted for in the 2014 psychiatric genomics consortium (PGC) mega GWAS, which  
230 identified over 100 common variant loci at rigorous genome-wide significance level<sup>3</sup>,  
231 making the disorder a suitable candidate to test the implementation of the PES framework.  
232 Using the complete summary statistics, we identified eight clinically actionable gene-sets (at  
233 the different  $P_T$ ) containing known drug targets (Table 1). The most significantly associated  
234 of these was the *HIF-2 pathway* ( $P = 3.12 \times 10^{-5}$ ,  $\beta = 0.435$ ,  $SE = 0.109$ ,  $P_T < 0.005$ ), which  
235 is comprised of genes in the hypoxia inducible factor 2 (HIF-2) alpha transcription factor  
236 network. *One carbon pool by folate* was the second most significant pathway with a putative  
237 drug interaction ( $P = 1.4 \times 10^{-4}$ ,  $\beta = 0.433$ ,  $SE = 0.119$ ,  $P_T < 0.05$ ). Two gene-sets were  
238 related to the function of the neurotransmitters GABA and Acetylcholine, whilst other  
239 signalling pathways represented were *NOS1* (Nitric Oxide Synthase I), *Hedgehog* signalling  
240 and the semaphorin related *CRMP (Collapsin Response Mediator) proteins in Sema3A*  
241 *signalling* pathway. In addition, the geneset *Regulation of Insulin Secretion* passed the  
242 threshold for inclusion.

243

244 The genes which constitute these eight pathways had upregulated expression in the brain  
245 relative to the rest of the protein coding genome, with the anterior cingulate cortex the most  
246 highly enriched region after multiple testing correction,  $P_{Adj} = 6.45 \times 10^{-13}$ . Conversely, they

247 were downregulated ( $P_{Adj} < 0.05$ ) in several peripheral tissues including the stomach and skin  
 248 (Supplementary Fig. 2). These genes were also overrepresented in the GWAS catalogue for  
 249 traits relevant to psychiatry including schizophrenia, post-traumatic stress disorder, nicotine  
 250 dependence and cognitive performance ( $P_{Adj} < 0.05$ , Supplementary Table 1).  
 251

| Pathway                                           | $P$ threshold ( $P_T$ ) | $P$                  |
|---------------------------------------------------|-------------------------|----------------------|
| NOS1 pathway                                      | All SNPs                | $6.3 \times 10^{-4}$ |
| Regulation of insulin secretion                   | $P < 0.5$               | $3.9 \times 10^{-4}$ |
| CRMPs in Sema3A signalling                        | $P < 0.5$               | $9.4 \times 10^{-4}$ |
| GABA synthesis, release, reuptake and degradation | $P < 0.5$               | $5.8 \times 10^{-4}$ |
| One carbon pool by folate                         | $P < 0.05$              | $1.4 \times 10^{-4}$ |
| Hedgehog signalling                               | $P < 0.05$              | $1.9 \times 10^{-4}$ |
| HIF-2 pathway                                     | $P < 0.005$             | $3.1 \times 10^{-5}$ |
| Acetylcholine binding and downstream events       | $P < 0.005$             | $3.8 \times 10^{-4}$ |

252 **Table 1. Pathways enriched with common variation associated with schizophrenia with putative**  
 253 **clinical actionability.** Pathways with putative clinical actionability by virtue of having targets for  
 254 existing drugs with potential for repurposing. Enrichment  $P$  values refer gene-set association aggregated  
 255 SNPs associated with schizophrenia in the PGC GWAS.

256  
 257 The eight gene-sets prioritised by our pipeline are indicative of a diverse range of drug  
 258 classes. We sought to investigate a selection of candidate pharmacological agents which may  
 259 be utilised for each PES input pathway. Firstly, we extracted the genes classified in the  
 260 TCRD as  $T_{Clin}$  from each of the gene-sets and matched them to their known drug-interactions  
 261 using the drug gene interaction database (DGidb v3.02, Supplementary Table 2). The top  
 262 FDA approved drug per pathway was selected based on the DGidb score of interaction  
 263 confidence between a  $T_{Clin}$  gene and drug. After annotation via the anatomical chemical

264 (ATC) classification system two candidate drugs were anti-neoplastic and  
265 immunomodulating agents (ATC = L), two were classified as nervous system (ATC = N),  
266 whilst the remaining encompassed one of the following: blood and blood forming organs  
267 (ATC = B), musculoskeletal system (ATC = M), sensory organs (ATC = S) and alimentary  
268 tract and metabolism (ATC = A). Clinical trials for schizophrenia, either completed or in the  
269 recruiting phase, were registered for three of these compounds – glycine, varenicline and  
270 exenatide.

271

272 Drugs which target a statistically significant number of genes in each pathway were derived  
273 using over-representation analysis in WebGestalt<sup>14</sup>. Of the eight gene-sets tested, six had a  
274 significant drug enrichment with a minimum overlap of three genes after multiple testing  
275 correction (Table 3, Supplementary Table 3). Nervous system drugs were the most common  
276 ATC category (level 1) across all the input pathways. Some interesting repurposing  
277 candidates with previous clinical trials in the disorder included the psychostimulant  
278 Atomoxiène<sup>24</sup>, the  $\alpha 4\beta 2$  nicotinic acetylcholine receptor subtype partial agonist Varenicline  
279<sup>25</sup>, acetylcysteine (*N*-acetylcysteine) - a precursor to the antioxidant glutathione<sup>26-28</sup>, ascorbic  
280 acid (Vitamin C)<sup>29; 30</sup>, vitamin E<sup>30</sup>, and memantine<sup>31; 32</sup>. Whilst the results of these trials  
281 were mixed, targeting such interventions to specific individuals based on genomic risk is yet  
282 to be investigated.

283

284

285

286

287

288

| Pathway       | Top Drug*                 | Overlap <sup>#</sup> | ATC Code                          |
|---------------|---------------------------|----------------------|-----------------------------------|
| NOS1          | Milnacipran               | 5                    | Other antidepressants             |
| GABA          | Temazepam                 | 14                   | Benzodiazepine derivatives        |
| Insulin       | Clodronic acid            | 3                    | Bisphosphonates                   |
| HIF-2         | Ascorbic acid (Vitamin C) | 3                    | Ascorbic acid (Vitamin C)         |
| Acetylcholine | Nicotine                  | 11                   | Drugs used in nicotine dependence |
| Folate        | Tetrahydrofolic acid      | 11                   | Folic acid and derivatives        |

289 **Table 2. The top enriched drug target for each *pharmacogenomic enrichment score* pathway with at**  
 290 **least three interacting genes after multiple testing correction.** Most significantly associated drug  
 291 after multiple testing correction was selected, when corrected *P* values were equal, the drug with the  
 292 highest geneset overlap was selected. Overlap refers to the number of genes targeted by the drug in  
 293 the candidate pathway.

294

### 295 **Individual profiling of pharmacogenomic enrichment scores in a schizophrenia cohort**

296 We profiled PES in a cohort of schizophrenia patients and screened healthy controls<sup>17</sup> and  
 297 identified members of the cohort with relatively high PES in clinically actionable gene-sets.  
 298 Firstly, we examined individuals in the top percentile of the ASRB cohort for each PES, to  
 299 explore the phenotypic characteristics of an elevated risk score with high confidence. There  
 300 were 55 individuals with a top percentile PES, as one schizophrenia case had elevated PES in  
 301 both the *One Carbon Pool by Folate* and the *GABA synthesis, release, reuptake and*  
 302 *degradation* pathways. From this subset, the majority were schizophrenia patients (N=38),  
 303 however, there was no significant association between top percentile status and diagnosis ( $z =$   
 304  $0.975$ ,  $P = 0.33$ ). We investigated clinical characteristics obtained for ASRB participants to  
 305 prioritise top percentile PES carriers who may benefit most from a personalised treatment  
 306 regime. Three variables were selected as a proxy of a more clinically challenging  
 307 presentation of the disorder: clozapine prescription (as a surrogate for treatment resistance), a

308 global assessment of functioning (GAF) score < 50, and an adolescent onset of the disorder  
309 before the age of 18<sup>33; 34</sup>. Interestingly, of the 38 schizophrenia cases with an elevated PES,  
310 71% of this subset meet at least one of these criteria (N =27): clozapine prescription (N = 9),  
311 GAF < 50 (N = 12), onset age < 18 (N = 9).

312

313 In addition, two less stringent partitions of elevated PES were implemented, specifically, a  
314 decile and quartile cut-off for PES in the entire cohort was used to triage patients at elevated  
315 risk of dysfunction in that pathway. The highest number of PES in the top decile or quartile  
316 respectively for an individual was six (Supplementary Fig. 3). An increasing number of PES  
317 in both the top quartile (OR = 1.1493 [95% CI: 1.016 – 1.303],  $P = 0.0287$ ) and decile (OR =  
318 1.207 [95% CI: 1.013 – 1.447],  $P = 0.0384$ ) was associated with schizophrenia. However,  
319 this signal was not significant after adjustment for PRS<sub>Total</sub>. As visualised with kernel density  
320 estimation in figure 1b-c, there is evidence of skew towards high PRS<sub>Total</sub> for those  
321 individuals with at least four top quartile or decile PES categories. Whilst the aim of this  
322 study was not to find association with cases for this cohort, two PES were nominally  
323 associated with schizophrenia in the ASRB - *Regulation of Insulin Secretion* ( $z = 2.262$ ,  $P =$   
324  $0.0237$ ) and the *Acetylcholine Binding and Downstream Events* pathways ( $z = 2.167$ ,  $P =$   
325  $0.0303$ ). However, significance was diminished when covaried for total schizophrenia PRS  
326 (PRS<sub>Total</sub>,  $P > 0.05$ ).

327

328

329

330

331

332

333

334

335

336

337

338

339

340

341

**a**

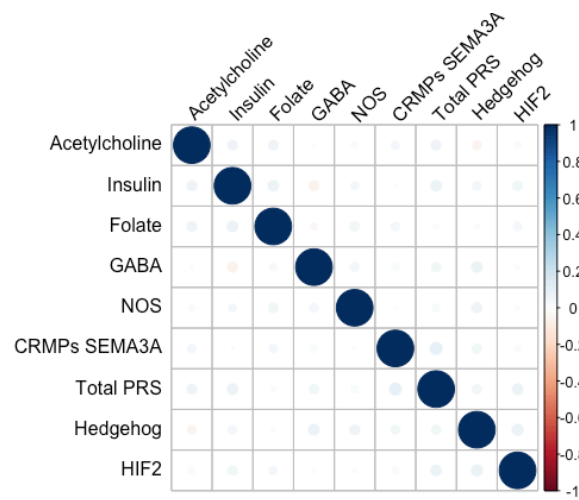

342

**b**

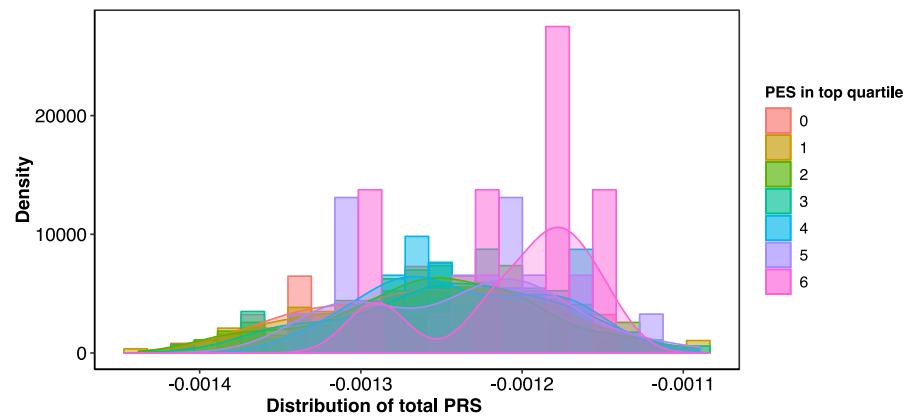

347

**c**

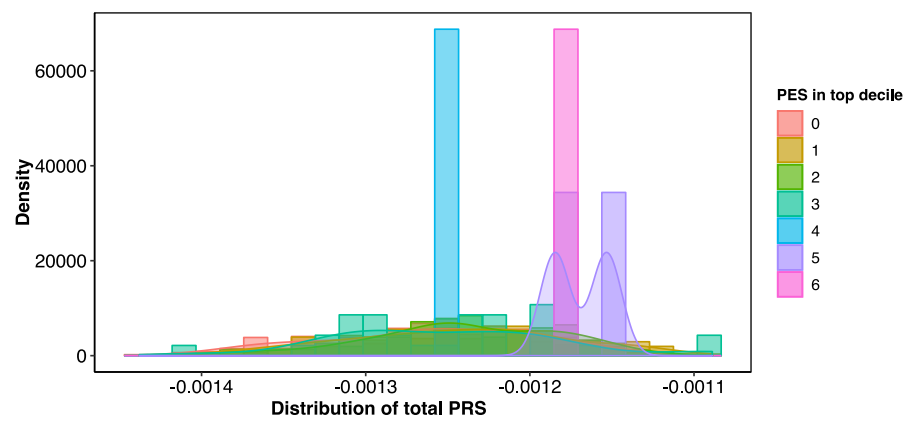

353

**d**

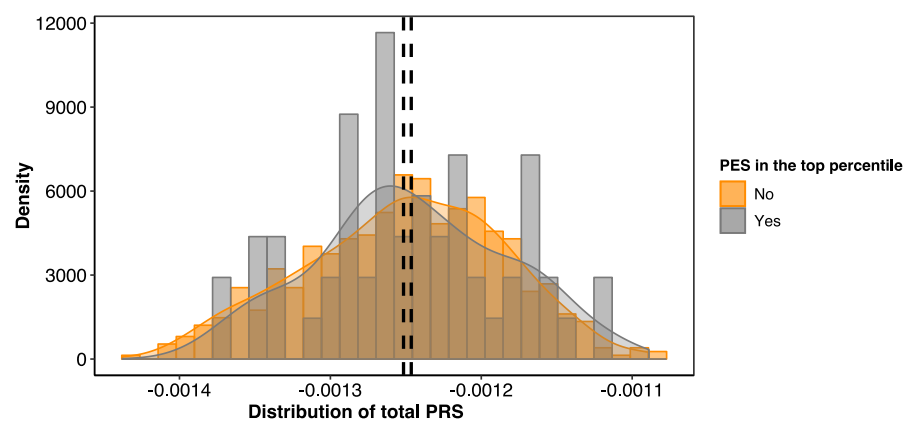

357

358 **Fig 1. Relationship between genome wide schizophrenia PRS and *pharmagenic***  
359 ***enrichment scores in the ASRB cohort.*** (a) Pairwise univariate correlation between each of  
360 the PES and total PRS. Scale represents strength of relationship in the positive or negative  
361 direction. Kernel density estimation of distribution of total PRS amongst individuals with  
362 multiple PES in the top quartile (b) or decile (c). Scale refers to the number of PES over the  
363 threshold in an individual, that is, a score of six represents an individual with six PES  
364 categories in the top quartile or decile of the ASRB cohort. (d) Distribution of total PRS  
365 between ASRB participants with at least one PES in the top percentile of the cohort (grey) or  
366 without (orange). Black dashed line represents the mean PRS<sub>Total</sub> for the cohort with a top  
367 percentile PES (right) and without (left).

368

369 **Relationship between pathway-based annotation and genome wide polygenic risk for**  
370 **schizophrenia**

371 We sought to define the relationship between PRS<sub>Total</sub> and PES in further detail. Pairwise  
372 correlation between each of the scores demonstrated no significant univariate relationship  
373 between any PES or with PRS<sub>Total</sub> (Fig. 1a). In addition, top percentile PES individuals were  
374 not enriched with PRS<sub>Total</sub> in comparison to the rest of the cohort:  $z = 0.819$ ,  $P = 0.413$  (Fig.  
375 1d). This presented a clinically significant subset of schizophrenia cases with a less polygenic  
376 phenotype, that is, low PRS<sub>Total</sub> relative to the schizophrenia cohort but high heritable risk in  
377 one or more pathways. Analysis of the bottom quartile of PRS<sub>Total</sub> in the ASRB schizophrenia  
378 cohort revealed cases (N=10) with top percentile PES but depleted PRS<sub>Total</sub>. The pathways  
379 encompassed in these individuals were: *Acetylcholine* (N=3), *Hedgehog signalling* (N=2),  
380 *CRMPs in Sema3A* (N=2), *GABA* (N=1), *HIF-2* (N=1) and *Insulin secretion* (N=1). This  
381 information may be of great clinical value as these cases have less marked common variant  
382 burden genome-wide, but localised risk in a geneset. Furthermore, three of these patients



383 were prescribed clozapine (surrogate for treatment resistance), a further three had low global  
384 functioning (GAF < 50), along with two adolescent onset cases – potentially highlighting a  
385 heightened need for precision intervention in these individuals.

386

387 To investigate the relationship between low polygenic load and elevated PES, genome wide  
388 PRS and the PES category count in the top decile per individual were clustered using finite  
389 Gaussian mixture modelling (GMM). The optimal number of clusters was selected based on  
390 parametrisation of the covariance matrix utilising the Bayesian Information Criterion (BIC),  
391 with the highest BIC value used for selection of the number of clusters (Fig. 2a). Four  
392 clusters were derived from the data ( $BIC = 13871.21$ , VEV: variable volume, equal shape,  
393 variable orientation) (Fig. 2b). Clusters were ellipsoidal, with the volume of the ellipsoid,  
394 shape of the density contours, and orientation of the corresponding ellipsoid also determined  
395 by the covariance matrix. The first two clusters were comprised of schizophrenia patients  
396 with at least one PES in the top decile of the ASRB cohort, with *Cluster 1* having low  
397  $PRS_{Total}$  relative to *Cluster 2*. The third and fourth clusters had no elevated PES but *Cluster 3*  
398 represents patients with greater polygenic load, that is  $PRS_{Total}$ , than the *Cluster 4*. The  
399 distribution of  $PRS_{Total}$  in *Cluster 1* reinforces the concept that a subset of schizophrenia  
400 patients with lower polygenic risk may have concentrated elevation in one or more specific  
401 biological systems. Analogous to its univariate relationship with  $PRS_{Total}$  individuals with  
402 extreme PES in the top percentile of the ARSB cohort were not enriched in any of the GMM  
403 clusters relative to the largest cluster, *Cluster 2* (*Cluster 2* vs *Cluster 1*:  $P = 0.668$ ; *Cluster 2*  
404 vs *Cluster 3*:  $P = 0.492$ ; *Cluster 2* vs *Cluster 4*:  $P = 0.977$ ).

405

406

407

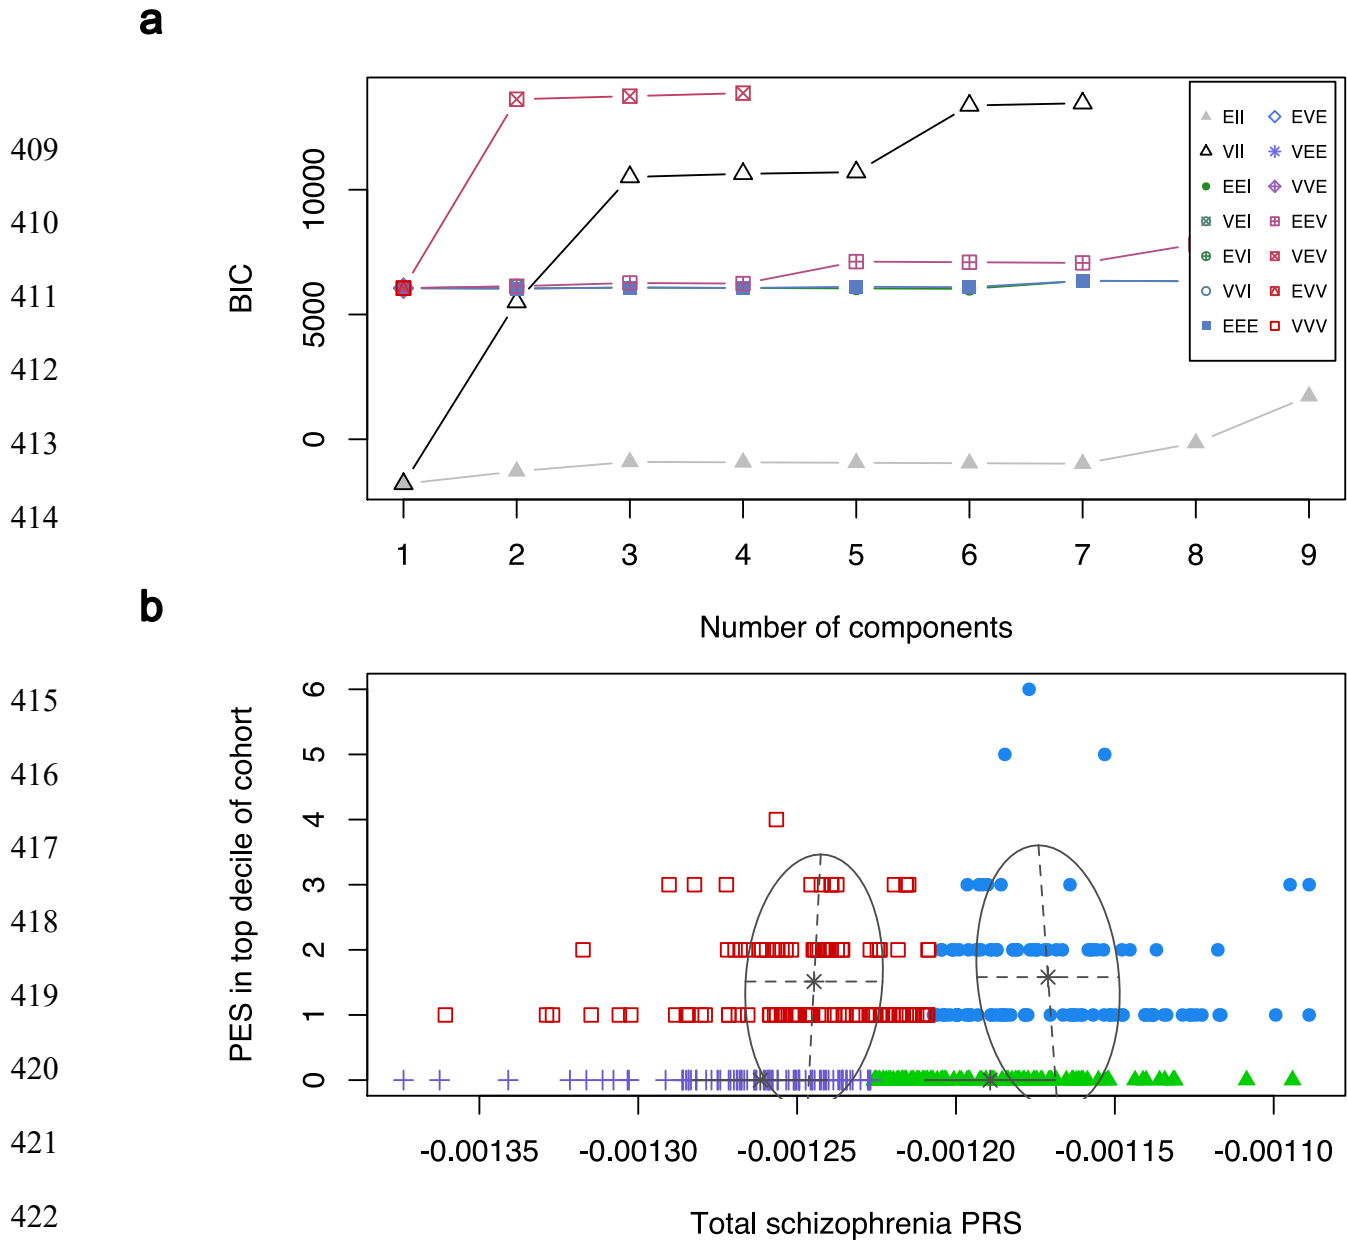

424 **Fig 2. Clustering of genome wide PRS and the individual count of elevated *pharmacogenic***  
 425 ***enrichment score* using finite Gaussian mixture modelling. (a)** Selection of the number of  
 426 clusters using the Bayesian information criterion (BIC). The scale represents the fourteen  
 427 different Gaussian models (see Supplementary Table 5 for definitions) tested for  
 428 parametrisation of the within-group covariance matrix. **(b)** Derived clusters of genome wide  
 429 schizophrenia PRS (Total PRS) and the number of PES in the top decile of the ASRB cohort

430 per individual. Red boxes = *Cluster 1*, blue circles = *Cluster 2*, green triangles = *Cluster 3*,  
431 purple crosses = *Cluster 4*.

432

### 433 **PES profiles impact the expression of genes within the candidate pathways**

434 Each PES profile was tested for association with the peripheral blood expression of genes  
435 within their respective pathways for a subset of schizophrenia cases with expression data  
436 available (Fig. 3, Supplementary Table 6). After covariation for sex, age, and PRS<sub>Total</sub>, the  
437 *NOS1* PES was associated with downregulated expression of the calcineurin subunit gene  
438 *PPP3CC* ( $t = -3.08$ ,  $P = 2.9 \times 10^{-3}$ ,  $q = 0.05$ ). This was followed by the *regulation of insulin*  
439 *secretion* PES, which was associated with decreased expression of the syntaxin gene *STX1A*  
440 ( $t = -3.5$ ,  $P = 8.1 \times 10^{-4}$ ,  $q = 0.055$ ); and the *One carbon pool by folate gene* PES, which was  
441 associated with downregulation of serine hydroxymethyltransferase 2 (*SHMT2*;  $t = -2.94$ ,  $P =$   
442  $4.5 \times 10^{-3}$ ,  $q = 0.072$ ). Excluding these three genes ( $q < 0.1$ ), there were eleven others with a  
443 nominally significant (Raw  $P < 0.05$ ) relationship with a PES, with all PES profiles except  
444 *CRMPs in Sema3A signalling* having at least one such nominally significant model.

445

446

447

448

449

450

451

### Regulation of insulin secretion

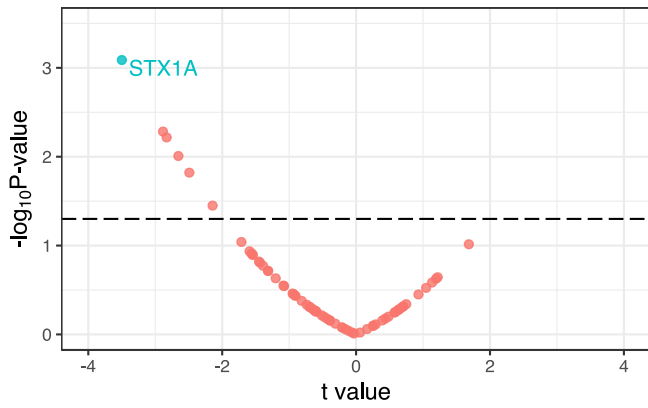

### NOS1 pathway

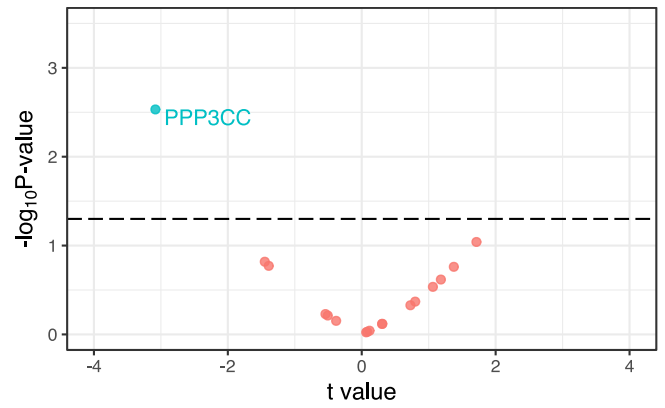

### One carbon pool by folate

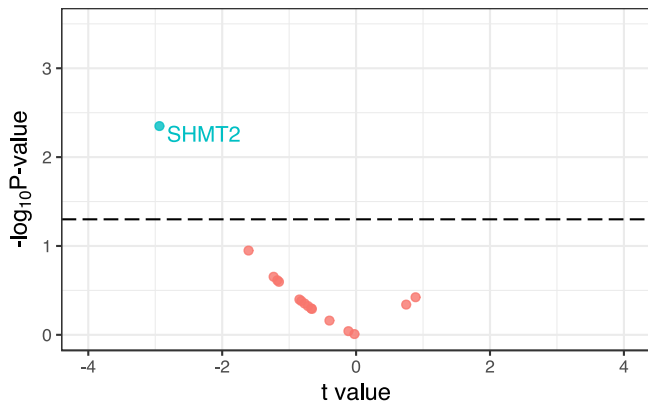

### Hedgehog signalling

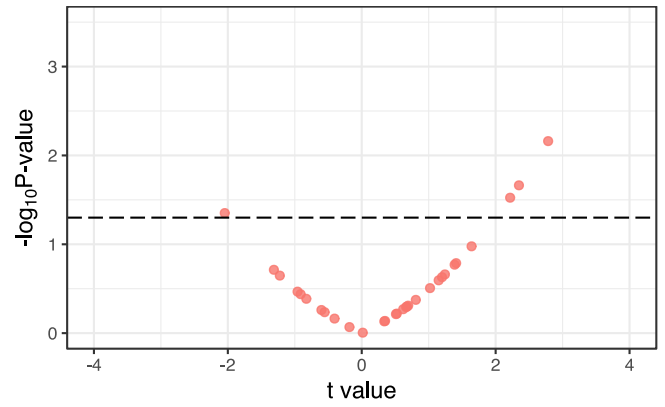

### HIF-2 pathway

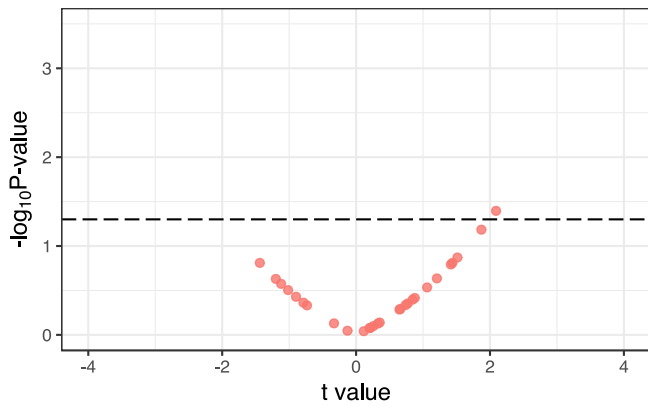

### Acetylcholine binding and downstream events

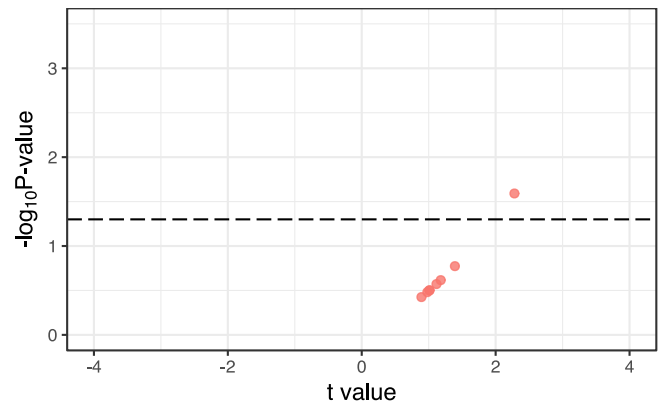

### GABA

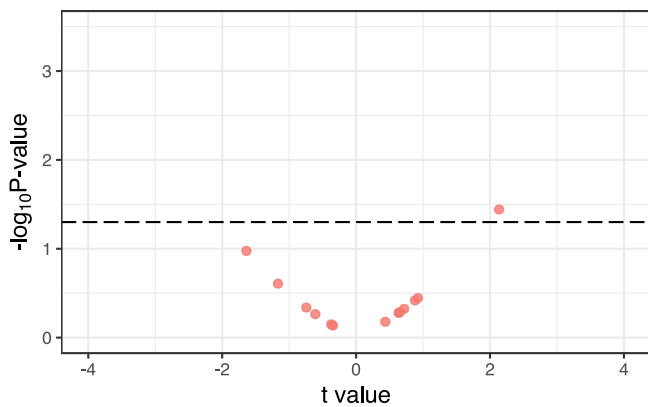

### CRMPs in Sema3A signalling

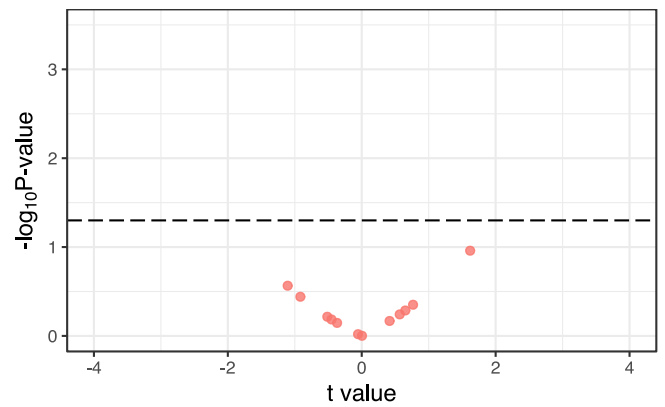

453 **Figure 3. The relationship between PES profiles and the expression of pathway genes in**  
454 **peripheral blood mononuclear cells.** Plot for each PES of the results of a model which  
455 investigated the association of PES with the expression of genes which compromise the PES  
456 pathway. The  $t$  values on the x-axes were derived from the regression model for each PES-  
457 gene pair ( $t = \hat{\beta} / \widehat{SE}$ ), with the  $-\log_{10} P$  value of association on the y-axes. The dotted line is  
458 indicative of uncorrected  $P < 0.05$ , genes highlighted blue were significant after correcting  
459 for the number of genes in the set with a liberal false discovery rate cut-off ( $q < 0.1$ ).

460

## 461 **DISCUSSION**

462 The drug development pipeline continues to be prohibitively expensive and time consuming  
463 in the translation of novel compounds for clinical practice<sup>35; 36</sup>. Repositioning of previously  
464 approved drugs for other human health conditions can be a more readily achievable action,  
465 particularly for rare disorders where a causal factor can be identified. However, in complex  
466 disorders, such as schizophrenia, this approach is hindered by the complexity of the  
467 pathophysiology and heterogeneity of genomic risk, along with inter-individual variability in  
468 illness onset and clinical course<sup>37; 38</sup>. Annotation of the individually-relevant (personalised)  
469 genetic components associated with complex syndromes, for the purpose of delineating  
470 clinically meaningful biological systems, will both better target existing treatments and reveal  
471 new opportunities for drug repurposing (Fig. 4a). In this study, we developed a novel method  
472 for capturing common variant risk in biological networks with known drug interactions –  
473 *pharmagenic enrichment scores* (PES) – to facilitate precision treatment design relevant to  
474 individuals with a particular set of risk variants. A distinct advantage of our PES approach is  
475 that it can capture latent enrichment of polygenic signal in pathways relevant to  
476 pharmaceutical actions, among individuals whose overall trait PRS is low relative to others  
477 with a shared phenotype. Even in cases where polygenic burden is high, genome-wide PRS

478 (as a biologically unannotated instrument) does not necessarily provide insight into pathways  
479 suitable for pharmacological intervention in individuals. Our approach for selection of  
480 putative drug targets exemplified in schizophrenia GWAS has revealed potential targets for  
481 drug repurposing with substantial clinical utility.

482

483 Aggregation of common variation from schizophrenia GWAS into biological pathways with  
484 known drug interactions revealed a diverse array of systems relevant to eight distinct PES  
485 categories. These candidate pathways displayed common variant enrichment at a range of  $P_T$ ,  
486 indicative of the degree of polygenicity, ranging from using all SNPs as input, to a  
487 significance threshold below 0.005 ( $P_T < 0.005$ ). While two of these pathways included  
488 GABAergic and cholinergic neurotransmission, both of which are intuitive candidates that  
489 have been extensively implicated in schizophrenia with associated drugs already in common  
490 practice for neuropsychiatric disorders<sup>39; 40</sup>, many others were more surprising. The most  
491 significantly associated gene-set pertained to the HIF-2 transcription factor network, an  
492 important mediator in response to decreases in available cellular oxygen. This has clear  
493 significance for biological mechanisms involved in psychiatric disorders, for example in  
494 dopaminergic signalling<sup>41</sup>. Enrichment of ascorbic acid (vitamin C) targets in this pathway is  
495 notable from a therapeutic perspective because of its antioxidant capabilities, along with  
496 preliminary evidence for its efficacy as an adjuvant in the treatment of the disorder<sup>29; 30</sup>. The  
497 interaction between HIF-2 signalling and NOS1 signalling, another candidate pathway with  
498 pharmagenic enrichment in schizophrenia, is supported by previous evidence of redox  
499 dysfunction in the disorder<sup>42; 43</sup>. The activity of glutamate receptors in the NOS1 system  
500 suggests that psycholeptics and psychoanaleptics are likely to modulate this pathway. We  
501 also observed common variant enrichment in two developmental pathways that can be  
502 pharmacologically modulated: CRMPs in semaphorin 3a signalling and Hedgehog signalling.

503 The former is able to interact with the tyrosine kinase inhibitor Dasatinib, which is postulated  
504 to have neuroprotective properties<sup>44</sup>. Enrichment in these actionable pathways is consistent  
505 with longstanding hypotheses of deficits in neurodevelopment contributing to the aetiology of  
506 schizophrenia<sup>45</sup>. There is also evidence for aetiological overlap between schizophrenia and  
507 diabetes beyond what is attributable to metabolic effects of antipsychotic treatment, which  
508 supports our identification of an insulin related pathway as a candidate PES<sup>46-48</sup>.

509

510 The breadth of drugs which target these pathways used to construct PES suggests that  
511 individual level treatment formulation can become highly specific depending on which  
512 systems genomic risk is localised. This would include the stratification of individuals for  
513 precision treatment with compounds previously tested on undifferentiated schizophrenia  
514 cohorts, including, N-acetylcysteine, vitamin C, Atomoxetine, and Varenicline which were  
515 identified using PES in this study<sup>24-26; 29</sup>. Repurposing drugs for individuals informed by  
516 their genetic liability may assist in the reduction of response heterogeneity, which hinders the  
517 implementation of novel treatments in very complex phenotypes like schizophrenia. We  
518 suggest that the individuals with PES in the top percentile of any pathway, particularly those  
519 with low genome wide PRS, present as the most tractable candidates for this approach;  
520 whereas the clinical significance of particular sets of common variant burden would be  
521 missed by an unannotated genome wide association indexed by total PRS alone.

522

523 In order to better understand how PES profiles could be leveraged for treatment, the effect of  
524 sequence variation which comprises the PES needs to be investigated. We outlined an  
525 example of this approach in this study by testing the effect of PES on the expression of genes  
526 which comprise each pathway in schizophrenia. Several associations between PES and  
527 mRNA expression were observed after correcting for the number of genes within the tested

528 set. These effects may arise due to direct *cis*-acting loci within the PES and/or the  
529 downstream biologic effects of variation which effect genes with interrelated functionality.  
530 This was exemplified by the *Regulation of insulin secretion* PES, which was negatively  
531 correlated with *STX1A* expression, a syntaxin postulated to play a role in insulin homeostasis.  
532 Interestingly, *STX1A* has been shown to be positively correlated with glucose stimulated  
533 insulin secretion, suggesting downregulation conferred by the PES may have an important  
534 effect through this biological pathway<sup>49; 50</sup>. Similarly, downregulation of the calcineurin  
535 subunit gene *PPP3CC* was associated with the *NOS1 pathway* PES. Previous research  
536 suggests there is a bidirectional relationship between nitric oxide signalling and calcineurin,  
537 where the calcineurin subunit is both regulated by redox products and able to induce nitric  
538 oxide synthesis<sup>51; 52</sup>. Several other genes had suggestive association with PES profiles which  
539 may be established with a larger cohort. We suspect that this approach to validation would be  
540 particularly informative for schizophrenia in genotyped expression cohorts from brain tissue.  
541  
542 While we expect that in most circumstances the aggregate of variation constituting high PES  
543 represent pathology of the target pathways, a current limitation of this methodology is that it  
544 does not integrate the direction of effect. While this may be possible as more functional  
545 annotations become available, this would present an immensely complex paradigm to predict  
546 *in silico* due to the vast array of factors which influence the penetrance of genomic risk. We  
547 believe that an analysis of the effect of PES profiles on gene expression in larger cohorts will  
548 be an important future direction of this work. The impact of candidate molecules could also  
549 be modelled in patient derived cell lines to, firstly, establish the extent of dysregulation  
550 conferred by elevated PES and, secondly, investigate the interaction with the compounds  
551 implicated. The current analysis also used very stringent criteria for drug pathway gene  
552 inclusion and there are likely to be many more genes and pathways that may be implicated in



553 future ontologies and other investigator curated gene-sets. In a recent example of this we  
554 observed an enrichment of retinoid gene variation in schizophrenia<sup>18</sup>.  
555  
556 New GWAS summary statistics are emerging daily on ever larger samples and these too will  
557 further enrich the substrate for PES determination and increase its clinical utility. Despite the  
558 aforementioned challenges, we believe that this methodology provides a useful framework to  
559 better utilise the breadth of available GWAS data for personalised treatment formulations.  
560 Particularly, as there remains a largely unmet need to translate polygenic risk for complex  
561 disorders into tractable treatment outcomes for affected individuals. Whilst we have  
562 demonstrated here the potential utility in schizophrenia, there is clearly scope to adapt this  
563 analytical approach to other complex disorders with summary statistics from well-powered  
564 GWAS. This methodology may also be applicable to prophylactic intervention for  
565 individuals at high risk for a complex phenotype (Fig. 4b). This could be implemented  
566 conservatively with lifestyle or dietary measures implicated by clusters of enrichment  
567 captured within the PES framework. For example, in schizophrenia we identified multiple  
568 actionable pathways quantified by PES that are modulated by vitamins, which represent a  
569 relatively uncomplicated intervention for individuals at high genetic risk for this disorder.

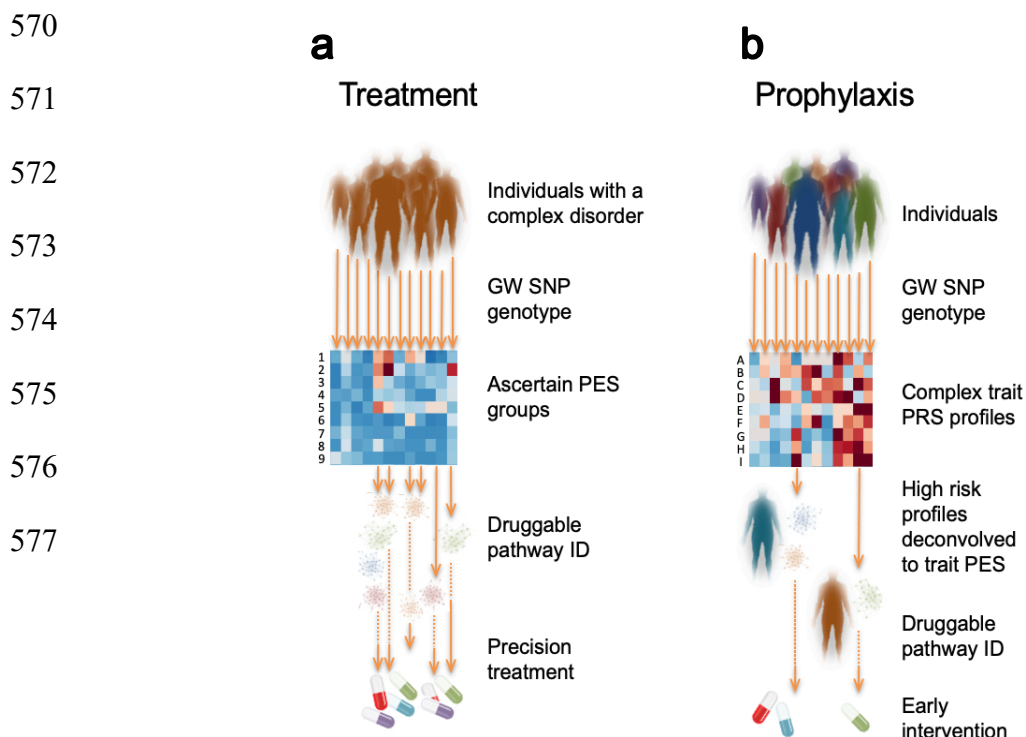

578 **Fig. 4. Implementation of *pharmagenic enrichment score* (PES) in precision treatment**  
579 **and prophylaxis of complex disorders. (a)** Using the PES framework individuals with a  
580 complex disorder provide DNA for common variant SNP genotyping, which is used to  
581 ascertain individuals with a high PES. The PES groups (heatmap rows 1-9, with enrichment  
582 denoted by darker colour) intrinsically identify precision treatment options tailored to the  
583 individual's biological enrichment (of pathways with known drug targets) for polygenic risk  
584 in that pathway. **(b)** A more advanced implementation of PES could be achieved for  
585 prophylactic intervention for individuals in the population at very high polygenic risk for a  
586 variety of complex traits with clinical actionability (heatmap rows A-I, with high PRS  
587 denoted by darker colour). Conservative prophylactic measures in this context may account  
588 for environmental risk exposure and focus on lifestyle interventions, such as diet and  
589 exercise, rather than pharmaceutical treatments that may not be justified without symptom  
590 presentation because of their side effect and/or cost.

591

## 592 **SUPPLEMENTAL DATA**

593 **Supplementary Fig 1.** Methodology for identifying pharmacologically-relevant pathways  
594 enriched with GWAS risk variants.

595 **Supplementary Fig 2.** Tissue specific expression of genes contained within candidate PES  
596 pathways derived from schizophrenia GWAS

597 **Supplementary Fig 3.** Distribution of schizophrenia and healthy control patients with  
598 multiple elevated *pharmagenic enrichment scores*.

599 **Supplementary Table 1.** Overrepresentation of genes within candidate PES pathways in the  
600 GWAS catalogue traits with relevance to psychiatry after multiple testing correction.

601 **Supplementary Table 2.** Highest confidence drug interaction between of a member of each  
602 pathway enriched with common polygenic risk for schizophrenia.

603 **Supplementary Table 3.** Enriched drug targets for each *pharmagenic enrichment score* with  
604 at least three interacting genes after multiple testing correction (FDR < 0.05).

605 **Supplementary Table 4.** Geometric characteristics of the Gaussian models used for  
606 parameterisations of the within-group covariance matrix.

607 **Supplementary Table 5.** Characteristics of the ASRB cohort analysed using the PES  
608 methodology.

609 **Supplementary Table 6.** Effect of PES on gene expression for genes which comprise each  
610 of the candidate pathways.

611

## 612 **DECLERATIONS OF INTERESTS**

613 The authors declare no conflicting financial interests

## 614 **DATA AVAILABILITY**

615 Schizophrenia GWAS data is available from the Psychiatric Genomics Consortium  
616 (<https://www.med.unc.edu/pgc/results-and-downloads>). SNP array data used in this study is

617 available upon application to the Australian Schizophrenia Research Bank, URL:

618 <https://www.neura.edu.au/discovery-portal/asrb/>. Command line arguments for the

619 bioinformatics tools in this study are available upon reasonable request to the authors.

620

## 621 **REFERENCES**

- 622 1. Visscher, P.M., Wray, N.R., Zhang, Q., Sklar, P., McCarthy, M.I., Brown, M.A., and  
623 Yang, J. (2017). 10 Years of GWAS Discovery: Biology, Function, and Translation.  
624 *American journal of human genetics* 101, 5-22.
- 625 2. Purcell, S.M., Wray, N.R., Stone, J.L., Visscher, P.M., O'Donovan, M.C., Sullivan, P.F.,  
626 and Sklar, P. (2009). Common polygenic variation contributes to risk of  
627 schizophrenia and bipolar disorder. *Nature* 460, 748-752.
- 628 3. Schizophrenia Working Group of the Psychiatric Genomics, C., Ripke, S., Neale, B.M.,  
629 Corvin, A., Walters, J.T.R., Farh, K.-H., Holmans, P.A., Lee, P., Bulik-Sullivan, B.,  
630 Collier, D.A., et al. (2014). Biological Insights From 108 Schizophrenia-Associated  
631 Genetic Loci. *Nature* 511, 421-427.
- 632 4. Xue, A., Wu, Y., Zhu, Z., Zhang, F., Kemper, K.E., Zheng, Z., Yengo, L., Lloyd-Jones,  
633 L.R., Sidorenko, J., Wu, Y., et al. (2018). Genome-wide association analyses identify

- 634 143 risk variants and putative regulatory mechanisms for type 2 diabetes. *Nature*  
635 *Communications* 9, 2941.
- 636 5. Patel, K.A., Oram, R.A., Flanagan, S.E., De Franco, E., Colclough, K., Shepherd, M.,  
637 Ellard, S., Weedon, M.N., and Hattersley, A.T. (2016). Type 1 Diabetes Genetic Risk  
638 Score: A Novel Tool to Discriminate Monogenic and Type 1 Diabetes. *Diabetes* 65,  
639 2094-2099.
- 640 6. Khera, A.V., Chaffin, M., Aragam, K.G., Haas, M.E., Roselli, C., Choi, S.H., Natarajan,  
641 P., Lander, E.S., Lubitz, S.A., Ellinor, P.T., et al. (2018). Genome-wide polygenic  
642 scores for common diseases identify individuals with risk equivalent to monogenic  
643 mutations. *Nature genetics* 50, 1219-1224.
- 644 7. Abraham, G., Havulinna, A.S., Bhalala, O.G., Byars, S.G., De Livera, A.M., Yetukuri, L.,  
645 Tikkanen, E., Perola, M., Schunkert, H., Sijbrands, E.J., et al. (2016). Genomic  
646 prediction of coronary heart disease. *European Heart Journal* 37, 3267-3278.
- 647 8. Belsky, D.W., Sears, M.R., Hancox, R.J., Harrington, H., Houts, R., Moffitt, T.E., Sugden,  
648 K., Williams, B., Poulton, R., and Caspi, A. (2013). Polygenic risk and the  
649 development and course of asthma: an analysis of data from a four-decade  
650 longitudinal study. *The Lancet Respiratory medicine* 1, 453-461.
- 651 9. Cleynen, I., Boucher, G., Jostins, L., Schumm, L.P., Zeissig, S., Ahmad, T., Andersen, V.,  
652 Andrews, J.M., Annese, V., Brand, S., et al. (2016). Inherited determinants of Crohn's  
653 disease and ulcerative colitis phenotypes: a genetic association study. *The Lancet* 387,  
654 156-167.
- 655 10. Liberzon, A., Birger, C., Thorvaldsdóttir, H., Ghandi, M., Mesirov, Jill P., and Tamayo,  
656 P. (2015). The Molecular Signatures Database Hallmark Gene Set Collection. *Cell*  
657 *Systems* 1, 417-425.
- 658 11. Oprea, T.I., Bologa, C.G., Brunak, S., Campbell, A., Gan, G.N., Gaulton, A., Gomez,  
659 S.M., Guha, R., Hersey, A., Holmes, J., et al. (2018). Unexplored therapeutic  
660 opportunities in the human genome. *Nature reviews Drug discovery* 17, 317-332.
- 661 12. de Leeuw, C.A., Mooij, J.M., Heskes, T., and Posthuma, D. (2015). MAGMA:  
662 Generalized Gene-Set Analysis of GWAS Data. *PLOS Computational Biology* 11,  
663 e1004219.
- 664 13. The International Multiple Sclerosis Genetics, C. (2010). Evidence for Polygenic  
665 Susceptibility to Multiple Sclerosis—The Shape of Things to Come. *American*  
666 *Journal of Human Genetics* 86, 621-625.
- 667 14. Wang, J., Vasaiakar, S., Shi, Z., Greer, M., and Zhang, B. (2017). WebGestalt 2017: a  
668 more comprehensive, powerful, flexible and interactive gene set enrichment analysis  
669 toolkit. *Nucleic Acids Research* 45, W130-W137.
- 670 15. Cotto, K.C., Wagner, A.H., Feng, Y.-Y., Kiwala, S., Coffman, A.C., Spies, G., Wollam,  
671 A., Spies, N.C., Griffith, O.L., and Griffith, M. (2018). DGIdb 3.0: a redesign and  
672 expansion of the drug-gene interaction database. *Nucleic Acids Research* 46, D1068-  
673 D1073.
- 674 16. Watanabe, K., Taskesen, E., van Bochoven, A., and Posthuma, D. (2017). Functional  
675 mapping and annotation of genetic associations with FUMA. *Nature Communications*  
676 8, 1826.
- 677 17. Loughland, C., Draganic, D., McCabe, K., Richards, J., Nasir, A., Allen, J., Catts, S.,  
678 Jablensky, A., Henskens, F., Michie, P., et al. (2010). Australian Schizophrenia  
679 Research Bank: a database of comprehensive clinical, endophenotypic and genetic  
680 data for aetiological studies of schizophrenia. *The Australian and New Zealand*  
681 *journal of psychiatry* 44, 1029-1035.

- 682 18. Reay, W.R., Atkins, J.R., Quidé, Y., Carr, V.J., Green, M.J., and Cairns, M.J. (2018).  
683 Polygenic disruption of retinoid signalling in schizophrenia and a severe cognitive  
684 deficit subtype. *Molecular Psychiatry*.
- 685 19. Euesden, J., Lewis, C.M., and O'Reilly, P.F. (2015). PRSice: Polygenic Risk Score  
686 software. *Bioinformatics (Oxford, England)* 31, 1466-1468.
- 687 20. Scrucca, L., Fop, M., Murphy, T.B., and Raftery, A.E. (2016). mclust 5: Clustering,  
688 Classification and Density Estimation Using Gaussian Finite Mixture Models. *The R*  
689 *journal* 8, 289-317.
- 690 21. Gardiner, E.J., Cairns, M.J., Liu, B., Beveridge, N.J., Carr, V., Kelly, B., Scott, R.J., and  
691 Tooney, P.A. (2013). Gene expression analysis reveals schizophrenia-associated  
692 dysregulation of immune pathways in peripheral blood mononuclear cells. *Journal of*  
693 *Psychiatric Research* 47, 425-437.
- 694 22. Hilker, R., Helenius, D., Fagerlund, B., Skytthe, A., Christensen, K., Werge, T.M.,  
695 Nordentoft, M., and Glenthøj, B. (2018). Heritability of Schizophrenia and  
696 Schizophrenia Spectrum Based on the Nationwide Danish Twin Register. *Biological*  
697 *Psychiatry* 83, 492-498.
- 698 23. Sullivan, P.F., Kendler, K.S., and Neale, M.C. (2003). Schizophrenia as a complex trait:  
699 Evidence from a meta-analysis of twin studies. *Archives of General Psychiatry* 60,  
700 1187-1192.
- 701 24. Kelly, D.L., Buchanan, R.W., Boggs, D.L., McMahon, R.P., Dickinson, D., Nelson, M.,  
702 Gold, J.M., Ball, M.P., Feldman, S., Liu, F., et al. (2009). A randomized double-blind  
703 trial of atomoxetine for cognitive impairments in 32 people with schizophrenia. *The*  
704 *Journal of clinical psychiatry* 70, 518-525.
- 705 25. Smith, R.C., Amiaz, R., Si, T.-M., Maayan, L., Jin, H., Boules, S., Sershen, H., Li, C.,  
706 Ren, J., Liu, Y., et al. (2016). Varenicline Effects on Smoking, Cognition, and  
707 Psychiatric Symptoms in Schizophrenia: A Double-Blind Randomized Trial. *PloS one*  
708 11, e0143490-e0143490.
- 709 26. Berk, M., Copolov, D., Dean, O., Lu, K., Jeavons, S., Schapkaitz, I., Anderson-Hunt, M.,  
710 Judd, F., Katz, F., Katz, P., et al. (2008). N-Acetyl Cysteine as a Glutathione  
711 Precursor for Schizophrenia—A Double-Blind, Randomized, Placebo-Controlled  
712 Trial. *Biological Psychiatry* 64, 361-368.
- 713 27. Breier, A., Liffick, E., Hummer, T.A., Vohs, J.L., Yang, Z., Mehdiyoun, N.F., Visco,  
714 A.C., Metzler, E., Zhang, Y., and Francis, M.M. (2018). Effects of 12-month, double-  
715 blind N-acetyl cysteine on symptoms, cognition and brain morphology in early phase  
716 schizophrenia spectrum disorders. *Schizophrenia Research* 199, 395-402.
- 717 28. Rapado-Castro, M., Dodd, S., Bush, A.I., Malhi, G.S., Skvarc, D.R., On, Z.X., Berk, M.,  
718 and Dean, O.M. (2017). Cognitive effects of adjunctive N-acetyl cysteine in  
719 psychosis. *Psychological medicine* 47, 866-876.
- 720 29. Dakhale, G.N., Khanzode, S.D., Khanzode, S.S., and Saoji, A. (2005). Supplementation  
721 of vitamin C with atypical antipsychotics reduces oxidative stress and improves the  
722 outcome of schizophrenia. *Psychopharmacology (Berl)* 182, 494-498.
- 723 30. Bentsen, H., Osnes, K., Refsum, H., Solberg, D.K., and Bohmer, T. (2013). A  
724 randomized placebo-controlled trial of an omega-3 fatty acid and vitamins E+C in  
725 schizophrenia. *Transl Psychiatry* 3, e335.
- 726 31. Veerman, S.R., Schulte, P.F., Smith, J.D., and de Haan, L. (2016). Memantine  
727 augmentation in clozapine-refractory schizophrenia: a randomized, double-blind,  
728 placebo-controlled crossover study. *Psychological medicine* 46, 1909-1921.
- 729 32. Lieberman, J.A., Papadakis, K., Csernansky, J., Litman, R., Volavka, J., Jia, X.D., and  
730 Gage, A. (2009). A randomized, placebo-controlled study of memantine as adjunctive

- 731 treatment in patients with schizophrenia. *Neuropsychopharmacology* : official  
732 publication of the American College of Neuropsychopharmacology 34, 1322-1329.
- 733 33. Samara, M.T., Dold, M., Gianatsi, M., and et al. (2016). Efficacy, acceptability, and  
734 tolerability of antipsychotics in treatment-resistant schizophrenia: A network meta-  
735 analysis. *JAMA Psychiatry* 73, 199-210.
- 736 34. Clemmensen, L., Vernal, D.L., and Steinhausen, H.-C. (2012). A systematic review of the  
737 long-term outcome of early onset schizophrenia. *BMC psychiatry* 12, 150-150.
- 738 35. Smietana, K., Siatkowski, M., and Møller, M. (2016). Trends in clinical success rates.  
739 *Nature Reviews Drug Discovery* 15, 379.
- 740 36. McNamee, L.M., Walsh, M.J., and Ledley, F.D. (2017). Timelines of translational  
741 science: From technology initiation to FDA approval. *PLOS ONE* 12, e0177371.
- 742 37. McGrath, J. (2008). Dissecting the Heterogeneity of Schizophrenia Outcomes.  
743 *Schizophrenia Bulletin* 34, 247-248.
- 744 38. Deng, C., and Dean, B. (2013). Mapping the pathophysiology of schizophrenia:  
745 interactions between multiple cellular pathways. *Frontiers in Cellular Neuroscience* 7.
- 746 39. de Jonge, J.C., Vinkers, C.H., Hulshoff Pol, H.E., and Marsman, A. (2017). GABAergic  
747 Mechanisms in Schizophrenia: Linking Postmortem and In Vivo Studies. *Frontiers in*  
748 *Psychiatry* 8, 118.
- 749 40. Scarr, E., Gibbons, A., Neo, J., Udawela, M., and Dean, B. (2013). Cholinergic  
750 connectivity: it's implications for psychiatric disorders. *Frontiers in Cellular*  
751 *Neuroscience* 7.
- 752 41. Smeyne, M., Sladen, P., Jiao, Y., Dragatsis, I., and Smeyne, R.J. (2015). HIF1 $\alpha$  is  
753 Necessary for Exercise-Induced Neuroprotection while HIF2 $\alpha$  is Needed for  
754 Dopaminergic Neuron Survival in the Substantia Nigra pars compacta. *Neuroscience*  
755 295, 23-38.
- 756 42. Schmidt-Kastner, R., van Os, J., Esquivel, G., Steinbusch, H.W.M., and Rutten, B.P.F.  
757 (2012). An environmental analysis of genes associated with schizophrenia: hypoxia  
758 and vascular factors as interacting elements in the neurodevelopmental model.  
759 *Molecular Psychiatry* 17, 1194.
- 760 43. Olson, N., and van der Vliet, A. (2011). Interactions between Nitric Oxide and Hypoxia-  
761 Inducible Factor Signaling Pathways in Inflammatory Disease. *Nitric oxide : biology*  
762 *and chemistry / official journal of the Nitric Oxide Society* 25, 125-137.
- 763 44. Wrasidlo, W., Crews, L.A., Tsigelny, I.F., Stocking, E., Kouznetsova, V.L., Price, D.,  
764 Paulino, A., Gonzales, T., Overk, C.R., Patrick, C., et al. (2014). Neuroprotective  
765 effects of the anti-cancer drug sunitinib in models of HIV neurotoxicity suggests  
766 potential for the treatment of neurodegenerative disorders. *British Journal of*  
767 *Pharmacology* 171, 5757-5773.
- 768 45. Rapoport, J.L., Giedd, J.N., and Gogtay, N. (2012). Neurodevelopmental model of  
769 schizophrenia: update 2012. *Molecular psychiatry* 17, 1228-1238.
- 770 46. Venkatasubramanian, G., Chittiprol, S., Neelakantachar, N., Naveen, M.N., Thirthall, J.,  
771 Gangadhar, B.N., and Shetty, K.T. (2007). Insulin and insulin-like growth factor-1  
772 abnormalities in antipsychotic-naïve schizophrenia. *The American journal of*  
773 *psychiatry* 164, 1557-1560.
- 774 47. Guest, P.C., Wang, L., Harris, L.W., Burling, K., Levin, Y., Ernst, A., Wayland, M.T.,  
775 Umrana, Y., Herberth, M., Koethe, D., et al. (2010). Increased levels of circulating  
776 insulin-related peptides in first-onset, antipsychotic naïve schizophrenia patients.  
777 *Molecular Psychiatry* 15, 118.
- 778 48. Hacking, S., Prins, B., Mamakou, V., Zengini, E., Marouli, E., Brčić, L., Serafetinidis,  
779 I., Lamnissou, K., Kontaxakis, V., Dedoussis, G., et al. (2018). Evidence for genetic

- 780 contribution to the increased risk of type 2 diabetes in schizophrenia. *Translational*  
781 *Psychiatry* 8, 252.
- 782 49. Andersson, S.A., Olsson, A.H., Esguerra, J.L.S., Heimann, E., Ladenvall, C., Edlund, A.,  
783 Salehi, A., Taneera, J., Degerman, E., Groop, L., et al. (2012). Reduced insulin  
784 secretion correlates with decreased expression of exocytotic genes in pancreatic islets  
785 from patients with type 2 diabetes. *Molecular and Cellular Endocrinology* 364, 36-45.
- 786 50. Liang, T., Qin, T., Xie, L., Dolai, S., Zhu, D., Prentice, K.J., Wheeler, M., Kang, Y.,  
787 Osborne, L., and Gaisano, H.Y. (2017). New Roles of Syntaxin-1A in Insulin Granule  
788 Exocytosis and Replenishment. *The Journal of biological chemistry* 292, 2203-2216.
- 789 51. Namgaladze, D., Hofer, H.W., and Ullrich, V. (2002). Redox control of calcineurin by  
790 targeting the binuclear Fe(2+)-Zn(2+) center at the enzyme active site. *J Biol Chem*  
791 277, 5962-5969.
- 792 52. Obasanjo-Blackshire, K., Mesquita, R., Jabr, R.I., Molkentin, J.D., Hart, S.L., Marber,  
793 M.S., Xia, Y., and Heads, R.J. (2006). Calcineurin regulates NFAT-dependent iNOS  
794 expression and protection of cardiomyocytes: co-operation with Src tyrosine kinase.  
795 *Cardiovascular research* 71, 672-683.
- 796
